# Supplementary figures and images for: Understanding the defect chemistry of alkali metal strontium silicate solid solutions: insights from experiment and theory
Source: Royal Society of Chemistry journal article supplement (doi:10.1039/c4ta04299a), 2014-09-24

### Supporting information

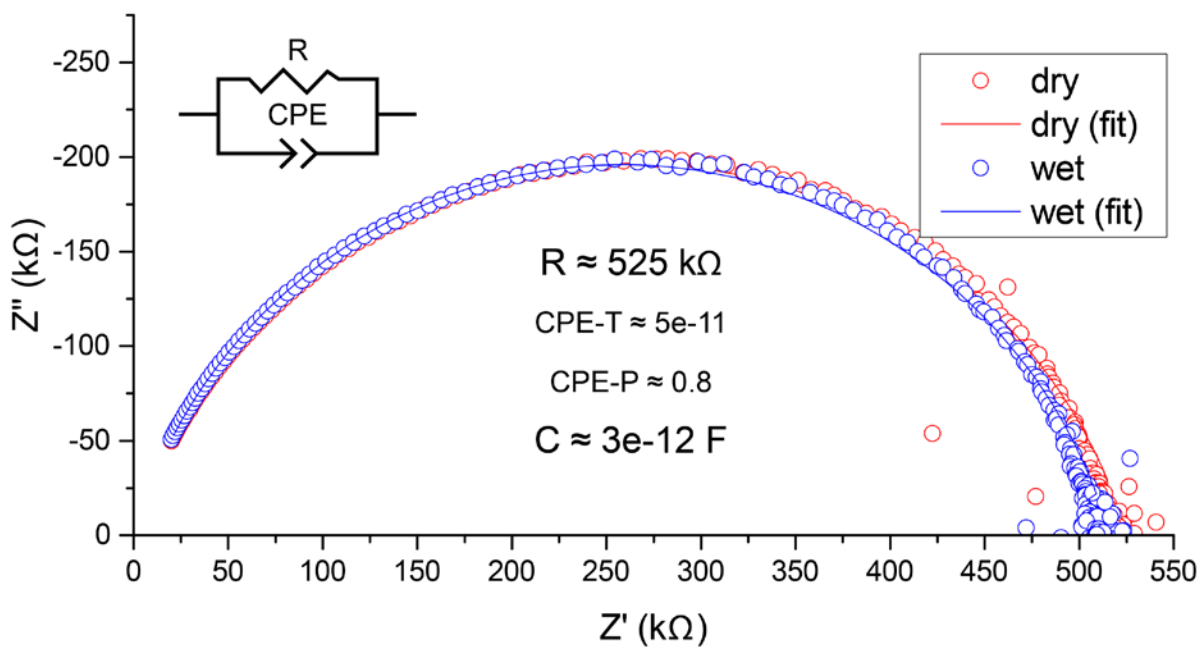

Figure S1. Example impedance spectra at 400 °C in both dry and wet conditions.

Supplement: c4ta04299a1.pdf [file c4ta04299a1.pdf]
